# Supplementary material
Source: publisher figshare collection journal article supplement (https://sage.figshare.com/ndownloader/files/17763254)
Supplement: Supplementary file 1 [file 17763254]

| PMID     | Author  | SRF | SRV  | comment                         |
|----------|---------|-----|------|---------------------------------|
| 26680075 | Yanishi |     | 44   | 48.8 digitized from scatterplot |
| 26680075 | Yanishi |     | 45   | 49 digitized from scatterplot   |
| 26680075 | Yanishi |     | 45.8 | 47.3 digitized from scatterplot |
| 26680075 | Yanishi |     | 46.4 | 46.9 digitized from scatterplot |
| 26680075 | Yanishi |     | 47.1 | 47.9 digitized from scatterplot |
| 26680075 | Yanishi |     | 47.8 | 47.2 digitized from scatterplot |
| 26680075 | Yanishi |     | 47.5 | 47.2 digitized from scatterplot |
| 26680075 | Yanishi |     | 48.1 | 47.7 digitized from scatterplot |
| 26680075 | Yanishi |     | 47.3 | 50.2 digitized from scatterplot |
| 26680075 | Yanishi |     | 47.6 | 50.5 digitized from scatterplot |
| 26680075 | Yanishi |     | 49.1 | 51.5 digitized from scatterplot |
| 26680075 | Yanishi |     | 49.3 | 49.7 digitized from scatterplot |
| 26680075 | Yanishi |     | 50.1 | 49.6 digitized from scatterplot |
| 26680075 | Yanishi |     | 50   | 50.1 digitized from scatterplot |
| 26680075 | Yanishi |     | 50   | 52.4 digitized from scatterplot |
| 26680075 | Yanishi |     | 50.7 | 53.7 digitized from scatterplot |
| 26680075 | Yanishi |     | 51.2 | 53.2 digitized from scatterplot |
| 26680075 | Yanishi |     | 50.6 | 51.8 digitized from scatterplot |
| 26680075 | Yanishi |     | 52.1 | 51.8 digitized from scatterplot |
| 26680075 | Yanishi |     | 51.1 | 51.9 digitized from scatterplot |
| 26680075 | Yanishi |     | 51.5 | 50.2 digitized from scatterplot |
| 26680075 | Yanishi |     | 52.2 | 50.1 digitized from scatterplot |
| 26680075 | Yanishi |     | 52.9 | 50.5 digitized from scatterplot |
| 26680075 | Yanishi |     | 53.1 | 50.5 digitized from scatterplot |
| 26680075 | Yanishi |     | 53.2 | 53 digitized from scatterplot   |
| 26680075 | Yanishi |     | 53.8 | 53.1 digitized from scatterplot |
| 26680075 | Yanishi |     | 54.3 | 53 digitized from scatterplot   |
| 26680075 | Yanishi |     | 54   | 54.2 digitized from scatterplot |
| 26680075 | Yanishi |     | 53.8 | 54.8 digitized from scatterplot |
| 26680075 | Yanishi |     | 54.8 | 52.9 digitized from scatterplot |
| 26680075 | Yanishi |     | 56   | 52.1 digitized from scatterplot |
| 26680075 | Yanishi |     | 56.6 | 51.2 digitized from scatterplot |
| 26680075 | Yanishi |     | 55.2 | 50.7 digitized from scatterplot |
| 26680075 | Yanishi |     | 57   | 53.6 digitized from scatterplot |
| 19963330 | Kato    |     | 46.9 | 48.5 from table                 |
| 19963330 | Kato    |     | 48.7 | 49 from table                   |
| 19963330 | Kato    |     | 46.2 | 48 from table                   |
| 19963330 | Kato    |     | 51.2 | 54 from table                   |
| 19963330 | Kato    |     | 48   | 46.9 from table                 |
| 19963330 | Kato    |     | 48.4 | 48.4 from table                 |
| 19963330 | Kato    |     | 45.5 | 46.7 from table                 |
| 19963330 | Kato    |     | 47.3 | 50.8 from table                 |
| 19963330 | Kato    |     | 52.8 | 53.2 from table                 |
| 19963330 | Kato    |     | 51.8 | 52.9 from table                 |
| 19963330 | Kato    |     | 50.7 | 50.1 from table                 |
| 19963330 | Kato    |     | 69.3 | 65.2 from table                 |
| 19963330 | Kato    |     | 43.4 | 47.6 from table                 |
| 19963330 | Kato    |     | 45.5 | 46.1 from table                 |
| 19963330 | Kato    |     | 46.4 | 47.4 from table                 |

|                  |      |                                 |
|------------------|------|---------------------------------|
| 19963330 Kato    | 51.4 | 48.8 from table                 |
| 19963330 Kato    | 52.1 | 49.6 from table                 |
| 19963330 Kato    | 47.2 | 51.7 from table                 |
| 19963330 Kato    | 48.1 | 48.8 from table                 |
| 19963330 Kato    | 51.9 | 51.6 from table                 |
| 19963330 Kato    | 48.2 | 47.8 from table                 |
| 19963330 Kato    | 50.1 | 50.6 from table                 |
| 19963330 Kato    | 47.9 | 49.4 from table                 |
| 19963330 Kato    | 50.9 | 48.3 from table                 |
| 19963330 Kato    | 45.2 | 46.6 from table                 |
| 19963330 Kato    | 49.5 | 49.3 from table                 |
| 19963330 Kato    | 51.5 | 49.3 from table                 |
| 19963330 Kato    | 49.8 | 49.9 from table                 |
| 15323404 Nilsson | 44   | 46.6 digitized from scatterplot |
| 15323404 Nilsson | 46   | 46 digitized from scatterplot   |
| 15323404 Nilsson | 47   | 46.9 digitized from scatterplot |
| 15323404 Nilsson | 47   | 47.7 digitized from scatterplot |
| 15323404 Nilsson | 47   | 48 digitized from scatterplot   |
| 15323404 Nilsson | 47   | 48.7 digitized from scatterplot |
| 15323404 Nilsson | 49   | 47.6 digitized from scatterplot |
| 15323404 Nilsson | 49   | 48.2 digitized from scatterplot |
| 15323404 Nilsson | 49   | 49 digitized from scatterplot   |
| 15323404 Nilsson | 50   | 47.7 digitized from scatterplot |
| 15323404 Nilsson | 50   | 48.8 digitized from scatterplot |
| 15323404 Nilsson | 50   | 49.2 digitized from scatterplot |
| 15323404 Nilsson | 50   | 49.4 digitized from scatterplot |
| 15323404 Nilsson | 50   | 49.5 digitized from scatterplot |
| 15323404 Nilsson | 50   | 49.6 digitized from scatterplot |
| 15323404 Nilsson | 51   | 49.8 digitized from scatterplot |
| 15323404 Nilsson | 52   | 49.3 digitized from scatterplot |
| 15323404 Nilsson | 51   | 50.8 digitized from scatterplot |
| 15323404 Nilsson | 51   | 50.7 digitized from scatterplot |
| 15323404 Nilsson | 52   | 51.2 digitized from scatterplot |
| 15323404 Nilsson | 51   | 51.8 digitized from scatterplot |
| 15323404 Nilsson | 53   | 51.4 digitized from scatterplot |
| 15323404 Nilsson | 54   | 52.1 digitized from scatterplot |
| 15323404 Nilsson | 53   | 51.9 digitized from scatterplot |
| 15323404 Nilsson | 53   | 52 digitized from scatterplot   |
| 15323404 Nilsson | 53   | 52.5 digitized from scatterplot |
| 15323404 Nilsson | 53   | 52.7 digitized from scatterplot |
| 22592618 Soga    | 39.9 | 41.5 digitized from scatterplot |
| 22592618 Soga    | 43.6 | 38.7 digitized from scatterplot |
| 22592618 Soga    | 46.4 | 43.2 digitized from scatterplot |
| 22592618 Soga    | 45.8 | 45.8 digitized from scatterplot |
| 22592618 Soga    | 45.8 | 46.5 digitized from scatterplot |
| 22592618 Soga    | 45   | 46.5 digitized from scatterplot |
| 22592618 Soga    | 47.1 | 49.5 digitized from scatterplot |
| 22592618 Soga    | 45.9 | 49.9 digitized from scatterplot |
| 22592618 Soga    | 45.9 | 48.6 digitized from scatterplot |
| 22592618 Soga    | 45.7 | 47.4 digitized from scatterplot |

|                    |      |                                 |
|--------------------|------|---------------------------------|
| 22592618 Soga      | 48.6 | 48.6 digitized from scatterplot |
| 22592618 Soga      | 48.7 | 47.9 digitized from scatterplot |
| 22592618 Soga      | 48.8 | 47.1 digitized from scatterplot |
| 22592618 Soga      | 49.7 | 47.6 digitized from scatterplot |
| 22592618 Soga      | 49.6 | 48.4 digitized from scatterplot |
| 22592618 Soga      | 49.2 | 49.3 digitized from scatterplot |
| 22592618 Soga      | 50   | 50.6 digitized from scatterplot |
| 22592618 Soga      | 50.7 | 51.3 digitized from scatterplot |
| 22592618 Soga      | 51   | 52.4 digitized from scatterplot |
| 22592618 Soga      | 49.9 | 53.7 digitized from scatterplot |
| 22592618 Soga      | 49.7 | 53.3 digitized from scatterplot |
| 22592618 Soga      | 50.1 | 55.1 digitized from scatterplot |
| 22592618 Soga      | 51   | 55.4 digitized from scatterplot |
| 22592618 Soga      | 55   | 57.4 digitized from scatterplot |
| 22592618 Soga      | 55.9 | 55.1 digitized from scatterplot |
| 22592618 Soga      | 54.6 | 54.4 digitized from scatterplot |
| 22592618 Soga      | 54.8 | 52.8 digitized from scatterplot |
| 22592618 Soga      | 53.1 | 53.7 digitized from scatterplot |
| 22592618 Soga      | 52.9 | 51 digitized from scatterplot   |
| 22592618 Soga      | 50.9 | 50.2 digitized from scatterplot |
| 22592618 Soga      | 51.3 | 48.5 digitized from scatterplot |
| 22592618 Soga      | 52.1 | 48.9 digitized from scatterplot |
| 22592618 Soga      | 53.3 | 47.9 digitized from scatterplot |
| 22592618 Soga      | 51.3 | 46.7 digitized from scatterplot |
| 22592618 Soga      | 51.1 | 47.6 digitized from scatterplot |
| 22592618 Soga      | 50.7 | 47.1 digitized from scatterplot |
| 22592618 Soga      | 55.1 | 50.9 digitized from scatterplot |
| 22592618 Soga      | 67   | 69.4 digitized from scatterplot |
| 26286903 Weinberge | 52.8 | 42.1 digitized from scatterplot |
| 26286903 Weinberge | 45.7 | 42.4 digitized from scatterplot |
| 26286903 Weinberge | 43.7 | 44.7 digitized from scatterplot |
| 26286903 Weinberge | 46.2 | 45.4 digitized from scatterplot |
| 26286903 Weinberge | 51.9 | 48.8 digitized from scatterplot |
| 26286903 Weinberge | 47.7 | 46.6 digitized from scatterplot |
| 26286903 Weinberge | 51   | 51.6 digitized from scatterplot |
| 26286903 Weinberge | 51.2 | 55.4 digitized from scatterplot |
| 26286903 Weinberge | 47.7 | 57.7 digitized from scatterplot |
| 26286903 Weinberge | 44.4 | 49.5 digitized from scatterplot |
| 26286903 Weinberge | 45.4 | 47.5 digitized from scatterplot |
| 26286903 Weinberge | 44.7 | 47.2 digitized from scatterplot |
| 26286903 Weinberge | 47.6 | 57.7 digitized from scatterplot |
| 17011152 Hackstein | 41   | 46 from table                   |
| 17011152 Hackstein | 46   | 47 from table                   |
| 17011152 Hackstein | 47   | 48 from table                   |
| 17011152 Hackstein | 47   | 48 from table                   |
| 17011152 Hackstein | 47   | 48 from table                   |
| 17011152 Hackstein | 48   | 49 from table                   |
| 17011152 Hackstein | 48   | 48 from table                   |
| 17011152 Hackstein | 49   | 48 from table                   |
| 17011152 Hackstein | 49   | 52 from table                   |

|          |           |       |                                        |
|----------|-----------|-------|----------------------------------------|
| 17011152 | Hackstein | 50    | 50 from table                          |
| 17011152 | Hackstein | 50    | 51 from table                          |
| 17011152 | Hackstein | 50    | 52 from table                          |
| 17011152 | Hackstein | 51    | 51 from table                          |
| 17011152 | Hackstein | 51    | 51 from table                          |
| 17011152 | Hackstein | 52    | 52 from table                          |
| 17011152 | Hackstein | 56    | 54 from table                          |
| 22578224 | Gupta     | 100   | 99.4 digitized from scatterplot        |
| 22578224 | Gupta     | 63.9  | 60.9 digitized from scatterplot        |
| 22578224 | Gupta     | 61.9  | 58.3 digitized from scatterplot        |
| 22578224 | Gupta     | 63    | 56.2 digitized from scatterplot        |
| 22578224 | Gupta     | 61.9  | 53.5 digitized from scatterplot        |
| 22578224 | Gupta     | 61    | 57.8 digitized from scatterplot        |
| 22578224 | Gupta     | 58.1  | 58.5 digitized from scatterplot        |
| 22578224 | Gupta     | 58    | 54.2 digitized from scatterplot        |
| 22578224 | Gupta     | 56    | 53.1 digitized from scatterplot        |
| 22578224 | Gupta     | 56    | 50.9 digitized from scatterplot        |
| 22578224 | Gupta     | 55.1  | 51.7 digitized from scatterplot        |
| 22578224 | Gupta     | 50.9  | 51.8 digitized from scatterplot        |
| 22578224 | Gupta     | 50.1  | 54.7 digitized from scatterplot        |
| 22578224 | Gupta     | 49    | 51.1 digitized from scatterplot        |
| 22578224 | Gupta     | 51    | 49.3 digitized from scatterplot        |
| 22578224 | Gupta     | 50.1  | 47.3 digitized from scatterplot        |
| 22578224 | Gupta     | 50.1  | 45.7 digitized from scatterplot        |
| 22578224 | Gupta     | 43.1  | 48.2 digitized from scatterplot        |
| 22578224 | Gupta     | 43    | 45.9 digitized from scatterplot        |
| 22578224 | Gupta     | 44.9  | 43.9 digitized from scatterplot        |
| 22578224 | Gupta     | 41.9  | 42.1 digitized from scatterplot        |
| 22578224 | Gupta     | 43.1  | 42.2 digitized from scatterplot        |
| 22578224 | Gupta     | 43.1  | 41.7 digitized from scatterplot        |
| 22578224 | Gupta     | 43.1  | 39.9 digitized from scatterplot        |
| 22578224 | Gupta     | 38.9  | 44.1 digitized from scatterplot        |
| 22578224 | Gupta     | 38    | 47.5 digitized from scatterplot        |
| 22578224 | Gupta     | 34    | 35.2 digitized from scatterplot        |
| 22578224 | Gupta     | 30    | 30.5 digitized from scatterplot        |
| 22578224 | Gupta     | 27.9  | 28.8 digitized from scatterplot        |
| 22578224 | Gupta     | 28.1  | 27.8 digitized from scatterplot        |
| 22578224 | Gupta     | 26    | 28.7 digitized from scatterplot        |
| 22578224 | Gupta     | 24.1  | 23.1 digitized from scatterplot        |
| 22578224 | Gupta     | 22    | 22 digitized from scatterplot          |
| 22578224 | Gupta     | 22    | 19 digitized from scatterplot          |
| 22578224 | Gupta     | 16    | 35.4 digitized from scatterplot        |
| 26356175 | Wahba     | 51.95 | 58.05 digitized from Bland-Altman plot |
| 26356175 | Wahba     | 53.95 | 57.85 digitized from Bland-Altman plot |
| 26356175 | Wahba     | 57.95 | 55.05 digitized from Bland-Altman plot |
| 26356175 | Wahba     | 58.95 | 55.65 digitized from Bland-Altman plot |
| 26356175 | Wahba     | 60.2  | 47.8 digitized from Bland-Altman plot  |
| 26356175 | Wahba     | 56.95 | 51.65 digitized from Bland-Altman plot |
| 26356175 | Wahba     | 57.05 | 52.75 digitized from Bland-Altman plot |
| 26356175 | Wahba     | 54.95 | 55.45 digitized from Bland-Altman plot |

|          |       |       |                                        |
|----------|-------|-------|----------------------------------------|
| 26356175 | Wahba | 54    | 55.4 digitized from Bland-Altman plot  |
| 26356175 | Wahba | 47    | 56.6 digitized from Bland-Altman plot  |
| 26356175 | Wahba | 46.95 | 56.85 digitized from Bland-Altman plot |
| 26356175 | Wahba | 48.9  | 55.5 digitized from Bland-Altman plot  |
| 26356175 | Wahba | 49.95 | 55.25 digitized from Bland-Altman plot |
| 26356175 | Wahba | 49.95 | 54.25 digitized from Bland-Altman plot |
| 26356175 | Wahba | 50.95 | 55.25 digitized from Bland-Altman plot |
| 26356175 | Wahba | 52    | 55.4 digitized from Bland-Altman plot  |
| 26356175 | Wahba | 52    | 54.4 digitized from Bland-Altman plot  |
| 26356175 | Wahba | 52.95 | 54.45 digitized from Bland-Altman plot |
| 26356175 | Wahba | 52.95 | 54.05 digitized from Bland-Altman plot |
| 26356175 | Wahba | 52.95 | 53.65 digitized from Bland-Altman plot |
| 26356175 | Wahba | 53.95 | 52.65 digitized from Bland-Altman plot |
| 26356175 | Wahba | 54.95 | 51.65 digitized from Bland-Altman plot |
| 26356175 | Wahba | 54    | 51.6 digitized from Bland-Altman plot  |
| 26356175 | Wahba | 53.95 | 51.85 digitized from Bland-Altman plot |
| 26356175 | Wahba | 53    | 52.8 digitized from Bland-Altman plot  |
| 26356175 | Wahba | 51.95 | 52.65 digitized from Bland-Altman plot |
| 26356175 | Wahba | 51.95 | 52.85 digitized from Bland-Altman plot |
| 26356175 | Wahba | 50.9  | 52.9 digitized from Bland-Altman plot  |
| 26356175 | Wahba | 50.95 | 52.05 digitized from Bland-Altman plot |
| 26356175 | Wahba | 51    | 51.2 digitized from Bland-Altman plot  |
| 26356175 | Wahba | 52    | 50.6 digitized from Bland-Altman plot  |
| 26356175 | Wahba | 52.95 | 51.65 digitized from Bland-Altman plot |
| 26356175 | Wahba | 52.9  | 51.3 digitized from Bland-Altman plot  |
| 26356175 | Wahba | 54    | 50.4 digitized from Bland-Altman plot  |
| 26356175 | Wahba | 54.95 | 50.05 digitized from Bland-Altman plot |
| 26356175 | Wahba | 54    | 49.8 digitized from Bland-Altman plot  |
| 26356175 | Wahba | 54    | 49.2 digitized from Bland-Altman plot  |
| 26356175 | Wahba | 54    | 48.8 digitized from Bland-Altman plot  |
| 26356175 | Wahba | 54.05 | 47.95 digitized from Bland-Altman plot |
| 26356175 | Wahba | 55    | 47.6 digitized from Bland-Altman plot  |
| 26356175 | Wahba | 54    | 45 digitized from Bland-Altman plot    |
| 26356175 | Wahba | 52.9  | 45.3 digitized from Bland-Altman plot  |
| 26356175 | Wahba | 52    | 44.8 digitized from Bland-Altman plot  |
| 26356175 | Wahba | 51    | 44.2 digitized from Bland-Altman plot  |
| 26356175 | Wahba | 50.95 | 42.65 digitized from Bland-Altman plot |
| 26356175 | Wahba | 50    | 39 digitized from Bland-Altman plot    |
| 26356175 | Wahba | 45.95 | 40.25 digitized from Bland-Altman plot |
| 26356175 | Wahba | 43    | 37.2 digitized from Bland-Altman plot  |
| 26356175 | Wahba | 36.95 | 43.85 digitized from Bland-Altman plot |
| 26356175 | Wahba | 43.9  | 42.1 digitized from Bland-Altman plot  |
| 26356175 | Wahba | 40.9  | 45.7 digitized from Bland-Altman plot  |
| 26356175 | Wahba | 41    | 47.4 digitized from Bland-Altman plot  |
| 26356175 | Wahba | 42.9  | 46.5 digitized from Bland-Altman plot  |
| 26356175 | Wahba | 43    | 45.8 digitized from Bland-Altman plot  |
| 26356175 | Wahba | 42.9  | 45.5 digitized from Bland-Altman plot  |
| 26356175 | Wahba | 43.95 | 46.45 digitized from Bland-Altman plot |
| 26356175 | Wahba | 43.95 | 47.05 digitized from Bland-Altman plot |
| 26356175 | Wahba | 43.95 | 48.05 digitized from Bland-Altman plot |

|                    |         |                                          |
|--------------------|---------|------------------------------------------|
| 26356175 Wahba     | 43.95   | 48.25 digitized from Bland-Altman plot   |
| 26356175 Wahba     | 44.95   | 47.45 digitized from Bland-Altman plot   |
| 26356175 Wahba     | 40.95   | 50.25 digitized from Bland-Altman plot   |
| 26356175 Wahba     | 41.9    | 49.7 digitized from Bland-Altman plot    |
| 26356175 Wahba     | 41.95   | 50.85 digitized from Bland-Altman plot   |
| 26356175 Wahba     | 42.95   | 50.65 digitized from Bland-Altman plot   |
| 26356175 Wahba     | 43.95   | 50.85 digitized from Bland-Altman plot   |
| 26356175 Wahba     | 44.95   | 50.45 digitized from Bland-Altman plot   |
| 26356175 Wahba     | 44      | 52.4 digitized from Bland-Altman plot    |
| 26356175 Wahba     | 46      | 53 digitized from Bland-Altman plot      |
| 26356175 Wahba     | 46      | 51.6 digitized from Bland-Altman plot    |
| 26356175 Wahba     | 46.95   | 51.65 digitized from Bland-Altman plot   |
| 26356175 Wahba     | 47.9    | 52.5 digitized from Bland-Altman plot    |
| 26356175 Wahba     | 48.95   | 52.45 digitized from Bland-Altman plot   |
| 26356175 Wahba     | 49.9    | 51.9 digitized from Bland-Altman plot    |
| 26356175 Wahba     | 49.95   | 51.65 digitized from Bland-Altman plot   |
| 26356175 Wahba     | 48.95   | 51.05 digitized from Bland-Altman plot   |
| 26356175 Wahba     | 48      | 51 digitized from Bland-Altman plot      |
| 26356175 Wahba     | 47.95   | 50.85 digitized from Bland-Altman plot   |
| 26356175 Wahba     | 47.9    | 50.1 digitized from Bland-Altman plot    |
| 26356175 Wahba     | 47.95   | 49.85 digitized from Bland-Altman plot   |
| 26356175 Wahba     | 47.95   | 48.65 digitized from Bland-Altman plot   |
| 26356175 Wahba     | 51.45   | 44.35 digitized from Bland-Altman plot   |
| 26356175 Wahba     | 46.85   | 47.75 digitized from Bland-Altman plot   |
| 26356175 Wahba     | 45.9    | 48.1 digitized from Bland-Altman plot    |
| 26356175 Wahba     | 46.9    | 49.5 digitized from Bland-Altman plot    |
| 26356175 Wahba     | 46.9    | 49.1 digitized from Bland-Altman plot    |
| 26356175 Wahba     | 45.95   | 46.05 digitized from Bland-Altman plot   |
| 26356175 Wahba     | 46      | 44.2 digitized from Bland-Altman plot    |
| 26356175 Wahba     | 47.9    | 46.3 digitized from Bland-Altman plot    |
| 26356175 Wahba     | 48.95   | 45.25 digitized from Bland-Altman plot   |
| 26356175 Wahba     | 49.05   | 45.15 digitized from Bland-Altman plot   |
| 26356175 Wahba     | 48.9    | 45.9 digitized from Bland-Altman plot    |
| 26356175 Wahba     | 50      | 47.2 digitized from Bland-Altman plot    |
| 26356175 Wahba     | 49.95   | 47.25 digitized from Bland-Altman plot   |
| 26356175 Wahba     | 49.9    | 49.5 digitized from Bland-Altman plot    |
| 26356175 Wahba     | 49.9    | 49.7 digitized from Bland-Altman plot    |
| 26356175 Wahba     | 51      | 47.6 digitized from Bland-Altman plot    |
| 26356175 Wahba     | 50.95   | 47.45 digitized from Bland-Altman plot   |
| 26356175 Wahba     | 51.9    | 47.9 digitized from Bland-Altman plot    |
| 26356175 Wahba     | 52      | 48.6 digitized from Bland-Altman plot    |
| 26356175 Wahba     | 46.893  | 49.307 digitized from Bland-Altman plot  |
| 20582545 Knox 2010 | 61.024  | 60.976 digitized from Bland-Altman plot  |
| 20582545 Knox 2010 | 58.03   | 58.37 digitized from Bland-Altman plot   |
| 20582545 Knox 2010 | 57.9095 | 54.2905 digitized from Bland-Altman plot |
| 20582545 Knox 2010 | 55.966  | 53.434 digitized from Bland-Altman plot  |
| 20582545 Knox 2010 | 49.988  | 57.212 digitized from Bland-Altman plot  |
| 20582545 Knox 2010 | 46.0235 | 53.3765 digitized from Bland-Altman plot |
| 20582545 Knox 2010 | 44.9395 | 49.8605 digitized from Bland-Altman plot |
| 20582545 Knox 2010 | 47.9585 | 53.2415 digitized from Bland-Altman plot |

|          |           |         |         |                                  |
|----------|-----------|---------|---------|----------------------------------|
| 20582545 | Knox 2010 | 47.9505 | 52.2495 | digitized from Bland-Altman plot |
| 20582545 | Knox 2010 | 49.9395 | 54.8605 | digitized from Bland-Altman plot |
| 20582545 | Knox 2010 | 49.923  | 52.877  | digitized from Bland-Altman plot |
| 20582545 | Knox 2010 | 48.9775 | 52.4225 | digitized from Bland-Altman plot |
| 20582545 | Knox 2010 | 49.01   | 51.99   | digitized from Bland-Altman plot |
| 20582545 | Knox 2010 | 47.949  | 50.851  | digitized from Bland-Altman plot |
| 20582545 | Knox 2010 | 47.9265 | 50.6735 | digitized from Bland-Altman plot |
| 20582545 | Knox 2010 | 46.974  | 50.626  | digitized from Bland-Altman plot |
| 20582545 | Knox 2010 | 45.9665 | 47.8335 | digitized from Bland-Altman plot |
| 20582545 | Knox 2010 | 45.9675 | 47.0325 | digitized from Bland-Altman plot |
| 20582545 | Knox 2010 | 45.9945 | 46.2055 | digitized from Bland-Altman plot |
| 20582545 | Knox 2010 | 47.923  | 48.677  | digitized from Bland-Altman plot |
| 20582545 | Knox 2010 | 46.963  | 49.037  | digitized from Bland-Altman plot |
| 20582545 | Knox 2010 | 46.9535 | 48.8465 | digitized from Bland-Altman plot |
| 20582545 | Knox 2010 | 46.9985 | 49.2015 | digitized from Bland-Altman plot |
| 20582545 | Knox 2010 | 48.002  | 49.998  | digitized from Bland-Altman plot |
| 20582545 | Knox 2010 | 47.9275 | 49.8725 | digitized from Bland-Altman plot |
| 20582545 | Knox 2010 | 47.95   | 50.05   | digitized from Bland-Altman plot |
| 20582545 | Knox 2010 | 48.942  | 50.058  | digitized from Bland-Altman plot |
| 20582545 | Knox 2010 | 48.9615 | 49.6385 | digitized from Bland-Altman plot |
| 20582545 | Knox 2010 | 53.0195 | 53.9805 | digitized from Bland-Altman plot |
| 20582545 | Knox 2010 | 49.9385 | 51.2615 | digitized from Bland-Altman plot |
| 20582545 | Knox 2010 | 49.984  | 50.816  | digitized from Bland-Altman plot |
| 20582545 | Knox 2010 | 49.9615 | 50.6385 | digitized from Bland-Altman plot |
| 20582545 | Knox 2010 | 50.9535 | 50.6465 | digitized from Bland-Altman plot |
| 20582545 | Knox 2010 | 51.992  | 51.608  | digitized from Bland-Altman plot |
| 20582545 | Knox 2010 | 52.9275 | 52.6725 | digitized from Bland-Altman plot |
| 20582545 | Knox 2010 | 48.945  | 45.455  | digitized from Bland-Altman plot |
| 20582545 | Knox 2010 | 48.964  | 45.836  | digitized from Bland-Altman plot |
| 20582545 | Knox 2010 | 50.03   | 48.17   | digitized from Bland-Altman plot |
| 20582545 | Knox 2010 | 50.0005 | 48.3995 | digitized from Bland-Altman plot |
| 20582545 | Knox 2010 | 49.932  | 48.668  | digitized from Bland-Altman plot |
| 20582545 | Knox 2010 | 49.9545 | 48.8455 | digitized from Bland-Altman plot |
| 20582545 | Knox 2010 | 50.985  | 48.815  | digitized from Bland-Altman plot |
| 20582545 | Knox 2010 | 52.0075 | 49.9925 | digitized from Bland-Altman plot |
| 20582545 | Knox 2010 | 51.946  | 49.854  | digitized from Bland-Altman plot |
| 20582545 | Knox 2010 | 52.9625 | 50.6375 | digitized from Bland-Altman plot |
| 20582545 | Knox 2010 | 52.9695 | 50.2305 | digitized from Bland-Altman plot |
| 20582545 | Knox 2010 | 53.9605 | 51.0395 | digitized from Bland-Altman plot |
| 20582545 | Knox 2010 | 54.9225 | 51.2775 | digitized from Bland-Altman plot |
| 20582545 | Knox 2010 | 55.0165 | 50.9835 | digitized from Bland-Altman plot |
| 25891692 | Yokoyama  | 43.589  | 44.211  | digitized from Bland-Altman plot |
| 25891692 | Yokoyama  | 44.092  | 45.308  | digitized from Bland-Altman plot |
| 25891692 | Yokoyama  | 43.442  | 45.958  | digitized from Bland-Altman plot |
| 25891692 | Yokoyama  | 42.2345 | 45.9655 | digitized from Bland-Altman plot |
| 25891692 | Yokoyama  | 43.3495 | 47.2505 | digitized from Bland-Altman plot |
| 25891692 | Yokoyama  | 44.397  | 49.203  | digitized from Bland-Altman plot |
| 25891692 | Yokoyama  | 44.1545 | 51.6455 | digitized from Bland-Altman plot |
| 25891692 | Yokoyama  | 44.6905 | 50.9095 | digitized from Bland-Altman plot |
| 25891692 | Yokoyama  | 45.991  | 49.609  | digitized from Bland-Altman plot |

|                    |         |                                          |
|--------------------|---------|------------------------------------------|
| 25891692 Yokoyama  | 45.639  | 47.561 digitized from Bland-Altman plot  |
| 25891692 Yokoyama  | 45.9075 | 47.2925 digitized from Bland-Altman plot |
| 25891692 Yokoyama  | 46.1945 | 47.8055 digitized from Bland-Altman plot |
| 25891692 Yokoyama  | 47.587  | 47.813 digitized from Bland-Altman plot  |
| 25891692 Yokoyama  | 47.251  | 48.749 digitized from Bland-Altman plot  |
| 25891692 Yokoyama  | 48.2405 | 47.7595 digitized from Bland-Altman plot |
| 25891692 Yokoyama  | 48.525  | 47.875 digitized from Bland-Altman plot  |
| 25891692 Yokoyama  | 48.6835 | 48.3165 digitized from Bland-Altman plot |
| 25891692 Yokoyama  | 48.6555 | 48.3445 digitized from Bland-Altman plot |
| 25891692 Yokoyama  | 50.357  | 47.643 digitized from Bland-Altman plot  |
| 25891692 Yokoyama  | 52.753  | 46.647 digitized from Bland-Altman plot  |
| 25891692 Yokoyama  | 54.342  | 48.858 digitized from Bland-Altman plot  |
| 25891692 Yokoyama  | 53.7465 | 49.0535 digitized from Bland-Altman plot |
| 25891692 Yokoyama  | 51.0035 | 48.9965 digitized from Bland-Altman plot |
| 25891692 Yokoyama  | 51.05   | 49.75 digitized from Bland-Altman plot   |
| 25891692 Yokoyama  | 50.3405 | 49.8595 digitized from Bland-Altman plot |
| 25891692 Yokoyama  | 49.3425 | 49.2575 digitized from Bland-Altman plot |
| 25891692 Yokoyama  | 45.8995 | 51.1005 digitized from Bland-Altman plot |
| 25891692 Yokoyama  | 46.2995 | 51.5005 digitized from Bland-Altman plot |
| 25891692 Yokoyama  | 46.6025 | 52.3975 digitized from Bland-Altman plot |
| 25891692 Yokoyama  | 48.31   | 55.49 digitized from Bland-Altman plot   |
| 25891692 Yokoyama  | 51.0875 | 54.1125 digitized from Bland-Altman plot |
| 25891692 Yokoyama  | 46.8385 | 51.3615 digitized from Bland-Altman plot |
| 25891692 Yokoyama  | 48.3475 | 51.8525 digitized from Bland-Altman plot |
| 25891692 Yokoyama  | 48.441  | 50.759 digitized from Bland-Altman plot  |
| 25891692 Yokoyama  | 49.049  | 50.151 digitized from Bland-Altman plot  |
| 25891692 Yokoyama  | 49.4345 | 50.5655 digitized from Bland-Altman plot |
| 25891692 Yokoyama  | 49.392  | 50.608 digitized from Bland-Altman plot  |
| 25891692 Yokoyama  | 50.2305 | 50.5695 digitized from Bland-Altman plot |
| 25891692 Yokoyama  | 50.1945 | 51.8055 digitized from Bland-Altman plot |
| 25891692 Yokoyama  | 50.338  | 52.062 digitized from Bland-Altman plot  |
| 25891692 Yokoyama  | 51.5555 | 51.2445 digitized from Bland-Altman plot |
| 25891692 Yokoyama  | 52.5465 | 53.2535 digitized from Bland-Altman plot |
| 25891692 Yokoyama  | 53.5405 | 53.0595 digitized from Bland-Altman plot |
| 25891692 Yokoyama  | 53.649  | 52.151 digitized from Bland-Altman plot  |
| 25891692 Yokoyama  | 52.9915 | 51.4085 digitized from Bland-Altman plot |
| 25891692 Yokoyama  | 54.057  | 51.343 digitized from Bland-Altman plot  |
| 25719258 Tanriover | 56.8    | 58.1 digitized from scatterplot          |
| 25719258 Tanriover | 57      | 56.9 digitized from scatterplot          |
| 25719258 Tanriover | 61      | 53.4 digitized from scatterplot          |
| 25719258 Tanriover | 61      | 52.7 digitized from scatterplot          |
| 25719258 Tanriover | 57.6    | 52.2 digitized from scatterplot          |
| 25719258 Tanriover | 55.9    | 53.4 digitized from scatterplot          |
| 25719258 Tanriover | 54.5    | 54.2 digitized from scatterplot          |
| 25719258 Tanriover | 52.1    | 54.2 digitized from scatterplot          |
| 25719258 Tanriover | 53      | 53 digitized from scatterplot            |
| 25719258 Tanriover | 54      | 52.8 digitized from scatterplot          |
| 25719258 Tanriover | 55      | 53.1 digitized from scatterplot          |
| 25719258 Tanriover | 54      | 52.4 digitized from scatterplot          |
| 25719258 Tanriover | 53.5    | 52 digitized from scatterplot            |



|                    |      |                                 |
|--------------------|------|---------------------------------|
| 25719258 Tanriover | 52.8 | 52.2 digitized from scatterplot |
| 25719258 Tanriover | 53   | 51.7 digitized from scatterplot |
| 25719258 Tanriover | 53.9 | 51.2 digitized from scatterplot |
| 25719258 Tanriover | 52.3 | 51.3 digitized from scatterplot |
| 25719258 Tanriover | 52.5 | 51.3 digitized from scatterplot |
| 25719258 Tanriover | 51.1 | 52.2 digitized from scatterplot |
| 25719258 Tanriover | 54   | 49.6 digitized from scatterplot |
| 25719258 Tanriover | 54.9 | 49.5 digitized from scatterplot |
| 25719258 Tanriover | 53.3 | 49.8 digitized from scatterplot |
| 25719258 Tanriover | 48.1 | 50.5 digitized from scatterplot |
| 25719258 Tanriover | 50.9 | 50 digitized from scatterplot   |
| 25719258 Tanriover | 51.1 | 50 digitized from scatterplot   |
| 25719258 Tanriover | 51.9 | 48.5 digitized from scatterplot |
| 25719258 Tanriover | 53.2 | 47.3 digitized from scatterplot |
| 25719258 Tanriover | 52.1 | 47.1 digitized from scatterplot |
| 25719258 Tanriover | 51.8 | 42.8 digitized from scatterplot |
| 25719258 Tanriover | 50.1 | 42.8 digitized from scatterplot |
| 25719258 Tanriover | 36.1 | 36.8 digitized from scatterplot |
| 25719258 Tanriover | 40.7 | 40.8 digitized from scatterplot |
| 25719258 Tanriover | 40.5 | 41.8 digitized from scatterplot |
| 25719258 Tanriover | 43.8 | 42.8 digitized from scatterplot |
| 25719258 Tanriover | 43.1 | 43.4 digitized from scatterplot |
| 25719258 Tanriover | 43.8 | 44.6 digitized from scatterplot |
| 25719258 Tanriover | 44.7 | 45.6 digitized from scatterplot |
| 25719258 Tanriover | 43.1 | 46 digitized from scatterplot   |
| 25719258 Tanriover | 40   | 47.8 digitized from scatterplot |
| 25719258 Tanriover | 45.1 | 50 digitized from scatterplot   |
| 25719258 Tanriover | 46   | 49.4 digitized from scatterplot |
| 25719258 Tanriover | 48.5 | 48.5 digitized from scatterplot |
| 25719258 Tanriover | 48.8 | 48 digitized from scatterplot   |
| 25719258 Tanriover | 49.8 | 47.9 digitized from scatterplot |
| 25719258 Tanriover | 50.2 | 48 digitized from scatterplot   |
| 25719258 Tanriover | 51.1 | 47.5 digitized from scatterplot |
| 25719258 Tanriover | 50.4 | 47.5 digitized from scatterplot |
| 25719258 Tanriover | 51.1 | 46.9 digitized from scatterplot |
| 25719258 Tanriover | 51   | 46.7 digitized from scatterplot |
| 25719258 Tanriover | 51.3 | 46 digitized from scatterplot   |
| 25719258 Tanriover | 47.5 | 44.3 digitized from scatterplot |
| 25719258 Tanriover | 47.4 | 44.7 digitized from scatterplot |
| 25719258 Tanriover | 46   | 44.4 digitized from scatterplot |
| 25719258 Tanriover | 46.3 | 45.4 digitized from scatterplot |
| 25719258 Tanriover | 47.1 | 45.4 digitized from scatterplot |
| 25719258 Tanriover | 48.1 | 45.3 digitized from scatterplot |
| 25719258 Tanriover | 48.1 | 45.6 digitized from scatterplot |
| 25719258 Tanriover | 49   | 45.8 digitized from scatterplot |
| 25719258 Tanriover | 49   | 45.9 digitized from scatterplot |
| 25719258 Tanriover | 49.7 | 46.4 digitized from scatterplot |
| 25719258 Tanriover | 50.1 | 46.7 digitized from scatterplot |
| 25719258 Tanriover | 49.4 | 46.8 digitized from scatterplot |
| 25719258 Tanriover | 49.7 | 47 digitized from scatterplot   |

|                    |         |                                          |
|--------------------|---------|------------------------------------------|
| 25719258 Tanriover | 50.4    | 47.1 digitized from scatterplot          |
| 25719258 Tanriover | 50.1    | 47.1 digitized from scatterplot          |
| 25719258 Tanriover | 50      | 46.9 digitized from scatterplot          |
| 25719258 Tanriover | 49.2    | 47.2 digitized from scatterplot          |
| 25719258 Tanriover | 48.9    | 47.5 digitized from scatterplot          |
| 25719258 Tanriover | 48.5    | 47 digitized from scatterplot            |
| 25719258 Tanriover | 48.1    | 47.2 digitized from scatterplot          |
| 25719258 Tanriover | 48      | 47.4 digitized from scatterplot          |
| 25719258 Tanriover | 47.8    | 46.8 digitized from scatterplot          |
| 25719258 Tanriover | 46.9    | 47.2 digitized from scatterplot          |
| 25719258 Tanriover | 46.7    | 46.9 digitized from scatterplot          |
| 25719258 Tanriover | 47.1    | 46.8 digitized from scatterplot          |
| 25719258 Tanriover | 47.1    | 46.9 digitized from scatterplot          |
| 25719258 Tanriover | 46      | 47.1 digitized from scatterplot          |
| 25719258 Tanriover | 45.6    | 47.3 digitized from scatterplot          |
| 25719258 Tanriover | 46      | 47.6 digitized from scatterplot          |
| 25719258 Tanriover | 45.6    | 46.2 digitized from scatterplot          |
| 25719258 Tanriover | 46.1    | 46.1 digitized from scatterplot          |
| 25719258 Tanriover | 46.3    | 46 digitized from scatterplot            |
| 25719258 Tanriover | 46.8    | 45.9 digitized from scatterplot          |
| 25719258 Tanriover | 47.3    | 46.2 digitized from scatterplot          |
| 25719258 Tanriover | 47.7    | 46.5 digitized from scatterplot          |
| 25719258 Tanriover | 48.1    | 46.3 digitized from scatterplot          |
| 25719258 Tanriover | 48.3    | 46.2 digitized from scatterplot          |
| 25719258 Tanriover | 48.1    | 46 digitized from scatterplot            |
| 25719258 Tanriover | 47.7    | 45.8 digitized from scatterplot          |
| 25719258 Tanriover | 47.4    | 45.8 digitized from scatterplot          |
| 24014687 Patankar  | 53.956  | 51.244 digitized from Bland-Altman plot  |
| 24014687 Patankar  | 52.955  | 51.245 digitized from Bland-Altman plot  |
| 24014687 Patankar  | 53.0175 | 50.5825 digitized from Bland-Altman plot |
| 24014687 Patankar  | 52.9755 | 47.2245 digitized from Bland-Altman plot |
| 24014687 Patankar  | 52.03   | 46.97 digitized from Bland-Altman plot   |
| 24014687 Patankar  | 49.0515 | 47.5485 digitized from Bland-Altman plot |
| 24014687 Patankar  | 46.985  | 46.415 digitized from Bland-Altman plot  |
| 24014687 Patankar  | 43.9845 | 48.2155 digitized from Bland-Altman plot |
| 24014687 Patankar  | 44.9915 | 48.8085 digitized from Bland-Altman plot |
| 24014687 Patankar  | 49.9885 | 49.2115 digitized from Bland-Altman plot |
| 24014687 Patankar  | 50.965  | 49.635 digitized from Bland-Altman plot  |
| 24014687 Patankar  | 50.933  | 50.467 digitized from Bland-Altman plot  |
| 24654729 Diez      | 41.9    | 52.3 digitized from Bland-Altman plot    |
| 24654729 Diez      | 38.95   | 49.05 digitized from Bland-Altman plot   |
| 24654729 Diez      | 40      | 48 digitized from Bland-Altman plot      |
| 24654729 Diez      | 42.05   | 48.15 digitized from Bland-Altman plot   |
| 24654729 Diez      | 41      | 45 digitized from Bland-Altman plot      |
| 24654729 Diez      | 40.15   | 40.65 digitized from Bland-Altman plot   |
| 24654729 Diez      | 44      | 48.2 digitized from Bland-Altman plot    |
| 24654729 Diez      | 43      | 47.8 digitized from Bland-Altman plot    |
| 24654729 Diez      | 43      | 47.2 digitized from Bland-Altman plot    |
| 24654729 Diez      | 42.9    | 47.5 digitized from Bland-Altman plot    |
| 24654729 Diez      | 43.45   | 46.95 digitized from Bland-Altman plot   |

|                 |       |                                        |
|-----------------|-------|----------------------------------------|
| 24654729 Diez   | 43.95 | 46.45 digitized from Bland-Altman plot |
| 24654729 Diez   | 44.05 | 45.95 digitized from Bland-Altman plot |
| 24654729 Diez   | 44.05 | 45.75 digitized from Bland-Altman plot |
| 24654729 Diez   | 44    | 44 digitized from Bland-Altman plot    |
| 24654729 Diez   | 45.95 | 42.65 digitized from Bland-Altman plot |
| 24654729 Diez   | 46    | 44 digitized from Bland-Altman plot    |
| 24654729 Diez   | 45.6  | 45 digitized from Bland-Altman plot    |
| 24654729 Diez   | 45    | 47 digitized from Bland-Altman plot    |
| 24654729 Diez   | 44.95 | 47.05 digitized from Bland-Altman plot |
| 24654729 Diez   | 48.05 | 54.15 digitized from Bland-Altman plot |
| 24654729 Diez   | 51    | 56 digitized from Bland-Altman plot    |
| 24654729 Diez   | 51    | 56.2 digitized from Bland-Altman plot  |
| 24654729 Diez   | 52    | 54.8 digitized from Bland-Altman plot  |
| 24654729 Diez   | 50    | 53.2 digitized from Bland-Altman plot  |
| 24654729 Diez   | 50.05 | 53.55 digitized from Bland-Altman plot |
| 24654729 Diez   | 46.05 | 48.55 digitized from Bland-Altman plot |
| 24654729 Diez   | 47    | 48.2 digitized from Bland-Altman plot  |
| 24654729 Diez   | 46.05 | 47.75 digitized from Bland-Altman plot |
| 24654729 Diez   | 45.95 | 47.25 digitized from Bland-Altman plot |
| 24654729 Diez   | 47    | 45 digitized from Bland-Altman plot    |
| 24654729 Diez   | 49    | 43.6 digitized from Bland-Altman plot  |
| 24654729 Diez   | 49.95 | 44.85 digitized from Bland-Altman plot |
| 24654729 Diez   | 49.05 | 46.15 digitized from Bland-Altman plot |
| 24654729 Diez   | 48    | 46.2 digitized from Bland-Altman plot  |
| 24654729 Diez   | 47    | 46.2 digitized from Bland-Altman plot  |
| 24654729 Diez   | 47.6  | 47 digitized from Bland-Altman plot    |
| 24654729 Diez   | 47.35 | 47.25 digitized from Bland-Altman plot |
| 24654729 Diez   | 48    | 47.8 digitized from Bland-Altman plot  |
| 24654729 Diez   | 48.45 | 48.35 digitized from Bland-Altman plot |
| 24654729 Diez   | 49    | 48.8 digitized from Bland-Altman plot  |
| 24654729 Diez   | 50.05 | 49.15 digitized from Bland-Altman plot |
| 24654729 Diez   | 50    | 48.8 digitized from Bland-Altman plot  |
| 24654729 Diez   | 49.95 | 48.05 digitized from Bland-Altman plot |
| 24654729 Diez   | 49.95 | 47.65 digitized from Bland-Altman plot |
| 24654729 Diez   | 51    | 46.2 digitized from Bland-Altman plot  |
| 24654729 Diez   | 51.95 | 48.65 digitized from Bland-Altman plot |
| 24654729 Diez   | 55.95 | 48.65 digitized from Bland-Altman plot |
| 24654729 Diez   | 59    | 57.6 digitized from Bland-Altman plot  |
| 24654729 Diez   | 56.6  | 54.4 digitized from Bland-Altman plot  |
| 24654729 Diez   | 54    | 50 digitized from Bland-Altman plot    |
| 24654729 Diez   | 54    | 52.6 digitized from Bland-Altman plot  |
| 24654729 Diez   | 53.05 | 52.95 digitized from Bland-Altman plot |
| 24654729 Diez   | 51.95 | 53.85 digitized from Bland-Altman plot |
| 24654729 Diez   | 51.95 | 52.65 digitized from Bland-Altman plot |
| 24654729 Diez   | 51.95 | 52.45 digitized from Bland-Altman plot |
| 24654729 Diez   | 51.95 | 51.65 digitized from Bland-Altman plot |
| 24654729 Diez   | 50.95 | 50.25 digitized from Bland-Altman plot |
| 24654729 Diez   | 50.95 | 50.85 digitized from Bland-Altman plot |
| 24654729 Diez   | 52    | 50.6 digitized from Bland-Altman plot  |
| 27396944 Barbas | 41.7  | 45.6 digitized from scatterplot        |

|          |        |      |                                 |
|----------|--------|------|---------------------------------|
| 27396944 | Barbas | 43.5 | 52.1 digitized from scatterplot |
| 27396944 | Barbas | 44.9 | 52.4 digitized from scatterplot |
| 27396944 | Barbas | 45   | 50.6 digitized from scatterplot |
| 27396944 | Barbas | 44.1 | 47.7 digitized from scatterplot |
| 27396944 | Barbas | 44.3 | 47.1 digitized from scatterplot |
| 27396944 | Barbas | 44.7 | 46.6 digitized from scatterplot |
| 27396944 | Barbas | 45.2 | 46.2 digitized from scatterplot |
| 27396944 | Barbas | 45.3 | 44.4 digitized from scatterplot |
| 27396944 | Barbas | 45.5 | 45.7 digitized from scatterplot |
| 27396944 | Barbas | 45.7 | 46 digitized from scatterplot   |
| 27396944 | Barbas | 45.6 | 48 digitized from scatterplot   |
| 27396944 | Barbas | 45.3 | 49 digitized from scatterplot   |
| 27396944 | Barbas | 45.7 | 49.4 digitized from scatterplot |
| 27396944 | Barbas | 46.2 | 51.2 digitized from scatterplot |
| 27396944 | Barbas | 46.3 | 50.3 digitized from scatterplot |
| 27396944 | Barbas | 46   | 50.7 digitized from scatterplot |
| 27396944 | Barbas | 46.1 | 47.9 digitized from scatterplot |
| 27396944 | Barbas | 46.5 | 47.9 digitized from scatterplot |
| 27396944 | Barbas | 47   | 47.2 digitized from scatterplot |
| 27396944 | Barbas | 47   | 48.8 digitized from scatterplot |
| 27396944 | Barbas | 46.8 | 49.4 digitized from scatterplot |
| 27396944 | Barbas | 47   | 49.3 digitized from scatterplot |
| 27396944 | Barbas | 47.2 | 49.6 digitized from scatterplot |
| 27396944 | Barbas | 47.5 | 51.3 digitized from scatterplot |
| 27396944 | Barbas | 47.3 | 50.9 digitized from scatterplot |
| 27396944 | Barbas | 47.4 | 50.5 digitized from scatterplot |
| 27396944 | Barbas | 47.2 | 50.7 digitized from scatterplot |
| 27396944 | Barbas | 49.7 | 55.3 digitized from scatterplot |
| 27396944 | Barbas | 49   | 52.4 digitized from scatterplot |
| 27396944 | Barbas | 48.7 | 50.9 digitized from scatterplot |
| 27396944 | Barbas | 48.5 | 50.6 digitized from scatterplot |
| 27396944 | Barbas | 48.3 | 50.6 digitized from scatterplot |
| 27396944 | Barbas | 48.3 | 49.2 digitized from scatterplot |
| 27396944 | Barbas | 48.4 | 48.6 digitized from scatterplot |
| 27396944 | Barbas | 48.3 | 48.6 digitized from scatterplot |
| 27396944 | Barbas | 48.3 | 46.9 digitized from scatterplot |
| 27396944 | Barbas | 48.4 | 46.9 digitized from scatterplot |
| 27396944 | Barbas | 49.1 | 46.3 digitized from scatterplot |
| 27396944 | Barbas | 49.6 | 46.7 digitized from scatterplot |
| 27396944 | Barbas | 49.5 | 49.2 digitized from scatterplot |
| 27396944 | Barbas | 58   | 52.3 digitized from scatterplot |
| 27396944 | Barbas | 56.7 | 51.7 digitized from scatterplot |
| 27396944 | Barbas | 56.2 | 50.3 digitized from scatterplot |
| 27396944 | Barbas | 55.3 | 52.9 digitized from scatterplot |
| 27396944 | Barbas | 54.4 | 54.7 digitized from scatterplot |
| 27396944 | Barbas | 54.3 | 55.6 digitized from scatterplot |
| 27396944 | Barbas | 54.2 | 53 digitized from scatterplot   |
| 27396944 | Barbas | 52.7 | 53.6 digitized from scatterplot |
| 27396944 | Barbas | 52.4 | 53.6 digitized from scatterplot |
| 27396944 | Barbas | 52.1 | 53.2 digitized from scatterplot |

|          |           |       |                                        |
|----------|-----------|-------|----------------------------------------|
| 27396944 | Barbas    | 51.7  | 52.1 digitized from scatterplot        |
| 27396944 | Barbas    | 52    | 51.4 digitized from scatterplot        |
| 27396944 | Barbas    | 51.5  | 51.4 digitized from scatterplot        |
| 27396944 | Barbas    | 50.8  | 53.1 digitized from scatterplot        |
| 27396944 | Barbas    | 49.9  | 52 digitized from scatterplot          |
| 27396944 | Barbas    | 49.6  | 52.4 digitized from scatterplot        |
| 27396944 | Barbas    | 50.4  | 48.3 digitized from scatterplot        |
| 27396944 | Barbas    | 50.6  | 49.6 digitized from scatterplot        |
| 27396944 | Barbas    | 50.1  | 49.5 digitized from scatterplot        |
| 27396944 | Barbas    | 49.6  | 50.1 digitized from scatterplot        |
| 27396944 | Barbas    | 49.3  | 49.3 digitized from scatterplot        |
| 27396944 | Barbas    | 52    | 47.1 digitized from scatterplot        |
| 27396944 | Barbas    | 52.7  | 47.6 digitized from scatterplot        |
| 27396944 | Barbas    | 53.1  | 48.8 digitized from scatterplot        |
| 27396944 | Barbas    | 53.4  | 48 digitized from scatterplot          |
| 27396944 | Barbas    | 53.7  | 50.1 digitized from scatterplot        |
| 27396944 | Barbas    | 53.6  | 49.5 digitized from scatterplot        |
| 27396944 | Barbas    | 54.3  | 49.8 digitized from scatterplot        |
| 27396944 | Barbas    | 54.3  | 50.1 digitized from scatterplot        |
| 27396944 | Barbas    | 55.1  | 50.8 digitized from scatterplot        |
| 27396944 | Barbas    | 55.3  | 51.5 digitized from scatterplot        |
| 27396944 | Barbas    | 55.1  | 51.8 digitized from scatterplot        |
| 27396944 | Barbas    | 54.7  | 52 digitized from scatterplot          |
| 27396944 | Barbas    | 54.5  | 51.7 digitized from scatterplot        |
| 27396944 | Barbas    | 54.6  | 51.3 digitized from scatterplot        |
| 27396944 | Barbas    | 53.9  | 51.2 digitized from scatterplot        |
| 27396944 | Barbas    | 53.5  | 52.3 digitized from scatterplot        |
| 27396944 | Barbas    | 53.2  | 52.4 digitized from scatterplot        |
| 27396944 | Barbas    | 52.8  | 52.9 digitized from scatterplot        |
| 27396944 | Barbas    | 52.8  | 52.2 digitized from scatterplot        |
| 27396944 | Barbas    | 53    | 51.5 digitized from scatterplot        |
| 27396944 | Barbas    | 52.4  | 50.8 digitized from scatterplot        |
| 27396944 | Barbas    | 51.6  | 49.2 digitized from scatterplot        |
| 27396944 | Barbas    | 51.3  | 49.7 digitized from scatterplot        |
| 27396944 | Barbas    | 51.3  | 50.6 digitized from scatterplot        |
| 27396944 | Barbas    | 51    | 50.8 digitized from scatterplot        |
| 27396944 | Barbas    | 50.6  | 51.1 digitized from scatterplot        |
| 18941100 | Summerlin | 39.1  | 29.3 digitized from Bland-Altman plot  |
| 18941100 | Summerlin | 46.45 | 39.15 digitized from Bland-Altman plot |
| 18941100 | Summerlin | 47.35 | 40.25 digitized from Bland-Altman plot |
| 18941100 | Summerlin | 48.3  | 42.1 digitized from Bland-Altman plot  |
| 18941100 | Summerlin | 48.85 | 43.15 digitized from Bland-Altman plot |
| 18941100 | Summerlin | 46.6  | 41.2 digitized from Bland-Altman plot  |
| 18941100 | Summerlin | 46.45 | 41.15 digitized from Bland-Altman plot |
| 18941100 | Summerlin | 46.7  | 42.1 digitized from Bland-Altman plot  |
| 18941100 | Summerlin | 46.1  | 42.1 digitized from Bland-Altman plot  |
| 18941100 | Summerlin | 46.35 | 43.05 digitized from Bland-Altman plot |
| 18941100 | Summerlin | 45.8  | 43 digitized from Bland-Altman plot    |
| 18941100 | Summerlin | 45.15 | 43.05 digitized from Bland-Altman plot |
| 18941100 | Summerlin | 45.15 | 44.05 digitized from Bland-Altman plot |

|                    |       |                                        |
|--------------------|-------|----------------------------------------|
| 18941100 Summerlin | 44.8  | 44 digitized from Bland-Altman plot    |
| 18941100 Summerlin | 44.45 | 44.95 digitized from Bland-Altman plot |
| 18941100 Summerlin | 45    | 46 digitized from Bland-Altman plot    |
| 18941100 Summerlin | 45.25 | 46.95 digitized from Bland-Altman plot |
| 18941100 Summerlin | 44.25 | 46.95 digitized from Bland-Altman plot |
| 18941100 Summerlin | 44.1  | 46.9 digitized from Bland-Altman plot  |
| 18941100 Summerlin | 43.9  | 47.9 digitized from Bland-Altman plot  |
| 18941100 Summerlin | 45.95 | 45.05 digitized from Bland-Altman plot |
| 18941100 Summerlin | 46.25 | 44.95 digitized from Bland-Altman plot |
| 18941100 Summerlin | 46.35 | 44.05 digitized from Bland-Altman plot |
| 18941100 Summerlin | 46.9  | 44.1 digitized from Bland-Altman plot  |
| 18941100 Summerlin | 47.7  | 44.1 digitized from Bland-Altman plot  |
| 18941100 Summerlin | 47.75 | 45.05 digitized from Bland-Altman plot |
| 18941100 Summerlin | 47.55 | 45.05 digitized from Bland-Altman plot |
| 18941100 Summerlin | 49.3  | 45.1 digitized from Bland-Altman plot  |
| 18941100 Summerlin | 49.95 | 46.05 digitized from Bland-Altman plot |
| 18941100 Summerlin | 49.35 | 46.05 digitized from Bland-Altman plot |
| 18941100 Summerlin | 48.95 | 46.05 digitized from Bland-Altman plot |
| 18941100 Summerlin | 48.7  | 46.1 digitized from Bland-Altman plot  |
| 18941100 Summerlin | 48.2  | 46 digitized from Bland-Altman plot    |
| 18941100 Summerlin | 48.05 | 45.95 digitized from Bland-Altman plot |
| 18941100 Summerlin | 47.7  | 46.1 digitized from Bland-Altman plot  |
| 18941100 Summerlin | 47.2  | 46 digitized from Bland-Altman plot    |
| 18941100 Summerlin | 46.9  | 46.1 digitized from Bland-Altman plot  |
| 18941100 Summerlin | 46.55 | 46.05 digitized from Bland-Altman plot |
| 18941100 Summerlin | 46.6  | 47 digitized from Bland-Altman plot    |
| 18941100 Summerlin | 46.85 | 46.95 digitized from Bland-Altman plot |
| 18941100 Summerlin | 47.2  | 47 digitized from Bland-Altman plot    |
| 18941100 Summerlin | 46.2  | 48 digitized from Bland-Altman plot    |
| 18941100 Summerlin | 47.2  | 48 digitized from Bland-Altman plot    |
| 18941100 Summerlin | 47    | 49 digitized from Bland-Altman plot    |
| 18941100 Summerlin | 46.9  | 49.9 digitized from Bland-Altman plot  |
| 18941100 Summerlin | 45.8  | 51.8 digitized from Bland-Altman plot  |
| 18941100 Summerlin | 46.4  | 50.8 digitized from Bland-Altman plot  |
| 18941100 Summerlin | 47.15 | 50.85 digitized from Bland-Altman plot |
| 18941100 Summerlin | 47.55 | 50.85 digitized from Bland-Altman plot |
| 18941100 Summerlin | 48.05 | 50.95 digitized from Bland-Altman plot |
| 18941100 Summerlin | 47.85 | 49.95 digitized from Bland-Altman plot |
| 18941100 Summerlin | 47.65 | 49.95 digitized from Bland-Altman plot |
| 18941100 Summerlin | 47.8  | 49 digitized from Bland-Altman plot    |
| 18941100 Summerlin | 48.25 | 48.95 digitized from Bland-Altman plot |
| 18941100 Summerlin | 48    | 48 digitized from Bland-Altman plot    |
| 18941100 Summerlin | 48.6  | 48 digitized from Bland-Altman plot    |
| 18941100 Summerlin | 48.85 | 47.95 digitized from Bland-Altman plot |
| 18941100 Summerlin | 48.9  | 47.1 digitized from Bland-Altman plot  |
| 18941100 Summerlin | 49.6  | 48 digitized from Bland-Altman plot    |
| 18941100 Summerlin | 49.6  | 49 digitized from Bland-Altman plot    |
| 18941100 Summerlin | 48.85 | 48.95 digitized from Bland-Altman plot |
| 18941100 Summerlin | 48.65 | 49.95 digitized from Bland-Altman plot |
| 18941100 Summerlin | 49.25 | 49.95 digitized from Bland-Altman plot |

|                    |       |                                        |
|--------------------|-------|----------------------------------------|
| 18941100 Summerlin | 49.05 | 49.95 digitized from Bland-Altman plot |
| 18941100 Summerlin | 48.9  | 50.9 digitized from Bland-Altman plot  |
| 18941100 Summerlin | 48.85 | 50.95 digitized from Bland-Altman plot |
| 18941100 Summerlin | 50.75 | 51.05 digitized from Bland-Altman plot |
| 18941100 Summerlin | 49.65 | 50.95 digitized from Bland-Altman plot |
| 18941100 Summerlin | 51.1  | 48.1 digitized from Bland-Altman plot  |
| 18941100 Summerlin | 51.35 | 48.05 digitized from Bland-Altman plot |
| 18941100 Summerlin | 52.5  | 48.1 digitized from Bland-Altman plot  |
| 18941100 Summerlin | 54    | 48.2 digitized from Bland-Altman plot  |
| 18941100 Summerlin | 53.45 | 49.15 digitized from Bland-Altman plot |
| 18941100 Summerlin | 53.3  | 50.1 digitized from Bland-Altman plot  |
| 18941100 Summerlin | 52.55 | 49.05 digitized from Bland-Altman plot |
| 18941100 Summerlin | 52.15 | 49.05 digitized from Bland-Altman plot |
| 18941100 Summerlin | 52.55 | 50.05 digitized from Bland-Altman plot |
| 18941100 Summerlin | 52.15 | 50.05 digitized from Bland-Altman plot |
| 18941100 Summerlin | 51.75 | 50.05 digitized from Bland-Altman plot |
| 18941100 Summerlin | 53.35 | 51.05 digitized from Bland-Altman plot |
| 18941100 Summerlin | 56.35 | 52.05 digitized from Bland-Altman plot |
| 18941100 Summerlin | 55.15 | 53.05 digitized from Bland-Altman plot |
| 18941100 Summerlin | 55.85 | 54.95 digitized from Bland-Altman plot |
| 18941100 Summerlin | 55.05 | 54.95 digitized from Bland-Altman plot |
| 18941100 Summerlin | 54.4  | 54 digitized from Bland-Altman plot    |
| 18941100 Summerlin | 55.35 | 56.85 digitized from Bland-Altman plot |
| 18941100 Summerlin | 57.45 | 62.75 digitized from Bland-Altman plot |
| 18941100 Summerlin | 52.45 | 59.75 digitized from Bland-Altman plot |
| 18941100 Summerlin | 50.25 | 59.75 digitized from Bland-Altman plot |
| 18941100 Summerlin | 48.55 | 55.85 digitized from Bland-Altman plot |
| 18941100 Summerlin | 48.25 | 55.75 digitized from Bland-Altman plot |
| 18941100 Summerlin | 47    | 53.8 digitized from Bland-Altman plot  |
| 18941100 Summerlin | 47.6  | 53.8 digitized from Bland-Altman plot  |
| 18941100 Summerlin | 48.9  | 53.9 digitized from Bland-Altman plot  |
| 18941100 Summerlin | 48.15 | 52.85 digitized from Bland-Altman plot |
| 18941100 Summerlin | 47.9  | 51.9 digitized from Bland-Altman plot  |
| 18941100 Summerlin | 47.3  | 51.9 digitized from Bland-Altman plot  |
| 18941100 Summerlin | 46.9  | 51.9 digitized from Bland-Altman plot  |
| 18941100 Summerlin | 51.45 | 54.95 digitized from Bland-Altman plot |
| 18941100 Summerlin | 49.5  | 52.9 digitized from Bland-Altman plot  |
| 18941100 Summerlin | 50.35 | 53.85 digitized from Bland-Altman plot |
| 18941100 Summerlin | 49.75 | 53.85 digitized from Bland-Altman plot |
| 18941100 Summerlin | 49.5  | 53.9 digitized from Bland-Altman plot  |
| 18941100 Summerlin | 50.45 | 52.95 digitized from Bland-Altman plot |
| 18941100 Summerlin | 48.55 | 51.85 digitized from Bland-Altman plot |
| 18941100 Summerlin | 48.7  | 51.9 digitized from Bland-Altman plot  |
| 18941100 Summerlin | 49.35 | 51.85 digitized from Bland-Altman plot |
| 18941100 Summerlin | 49.9  | 51.9 digitized from Bland-Altman plot  |
| 18941100 Summerlin | 50.1  | 51.9 digitized from Bland-Altman plot  |
| 18941100 Summerlin | 53.1  | 54.9 digitized from Bland-Altman plot  |
| 18941100 Summerlin | 52.9  | 53.9 digitized from Bland-Altman plot  |
| 18941100 Summerlin | 53.3  | 53.9 digitized from Bland-Altman plot  |
| 18941100 Summerlin | 53.2  | 53 digitized from Bland-Altman plot    |

|                              |             |       |          |                                  |
|------------------------------|-------------|-------|----------|----------------------------------|
| 18941100                     | Summerlin   | 52.85 | 52.95    | digitized from Bland-Altman plot |
| 18941100                     | Summerlin   | 52.6  | 52       | digitized from Bland-Altman plot |
| 18941100                     | Summerlin   | 52.2  | 52       | digitized from Bland-Altman plot |
| 18941100                     | Summerlin   | 51.6  | 52       | digitized from Bland-Altman plot |
| 18941100                     | Summerlin   | 51.95 | 52.05    | digitized from Bland-Altman plot |
| 18941100                     | Summerlin   | 51.6  | 51       | digitized from Bland-Altman plot |
| 18941100                     | Summerlin   | 51.05 | 50.95    | digitized from Bland-Altman plot |
| 18941100                     | Summerlin   | 51.35 | 51.05    | digitized from Bland-Altman plot |
| 18941100                     | Summerlin   | 50.9  | 50.1     | digitized from Bland-Altman plot |
| 18941100                     | Summerlin   | 50.35 | 50.05    | digitized from Bland-Altman plot |
| 18941100                     | Summerlin   | 49.85 | 49.95    | digitized from Bland-Altman plot |
| 18941100                     | Summerlin   | 49.95 | 50.05    | digitized from Bland-Altman plot |
| 18941100                     | Summerlin   | 50.4  | 49       | digitized from Bland-Altman plot |
| 18941100                     | Summerlin   | 50.2  | 49       | digitized from Bland-Altman plot |
| present study (technician 2) | present stu | 47    | 51.64458 | raw study data                   |
| present study (technician 2) | present stu | 49    | 53.82054 | raw study data                   |
| present study (technician 2) | present stu | 43    | 51.52246 | raw study data                   |
| present study (technician 2) | present stu | 51    | 52.74346 | raw study data                   |
| present study (technician 2) | present stu | 48    | 27.13515 | raw study data                   |
| present study (technician 2) | present stu | 45    | 50.97057 | raw study data                   |
| present study (technician 2) | present stu | 50    | 51.96965 | raw study data                   |
| present study (technician 2) | present stu | 52    | 56.06649 | raw study data                   |
| present study (technician 2) | present stu | 49    | 53.00752 | raw study data                   |
| present study (technician 2) | present stu | 51    | 47.34731 | raw study data                   |
| present study (technician 2) | present stu | 50.1  | 52.69039 | raw study data                   |
| present study (technician 2) | present stu | 44    | 53.05963 | raw study data                   |
| present study (technician 2) | present stu | 42    | 42.06471 | raw study data                   |
| present study (technician 2) | present stu | 54    | 50.69829 | raw study data                   |
| present study (technician 2) | present stu | 49    | 46.98763 | raw study data                   |
| present study (technician 2) | present stu | 47    | 49.19786 | raw study data                   |
| present study (technician 2) | present stu | 48    | 45.29507 | raw study data                   |
| present study (technician 2) | present stu | 47    | 52.74631 | raw study data                   |
| present study (technician 2) | present stu | 53    | 44.45914 | raw study data                   |
| present study (technician 2) | present stu | 50    | 45.17675 | raw study data                   |
| present study (technician 2) | present stu | 51    | 51.31602 | raw study data                   |
| present study (technician 2) | present stu | 47    | 51.7339  | raw study data                   |
| present study (technician 2) | present stu | 53    | 54.77737 | raw study data                   |
| present study (technician 2) | present stu | 53    | 49.7809  | raw study data                   |
| present study (technician 2) | present stu | 55    | 55.45179 | raw study data                   |
| present study (technician 2) | present stu | 52    | 43.0327  | raw study data                   |
| present study (technician 2) | present stu | 49    | 51.0739  | raw study data                   |
| present study (technician 2) | present stu | 53    | 50.84566 | raw study data                   |
| present study (technician 2) | present stu | 56    | 57.4601  | raw study data                   |
| present study (technician 2) | present stu | 51    | 47.64147 | raw study data                   |
| present study (technician 2) | present stu | 49    | 54.07942 | raw study data                   |
| present study (technician 2) | present stu | 55    | 52.48905 | raw study data                   |
| present study (technician 2) | present stu | 46    | 47.18963 | raw study data                   |
| present study (technician 2) | present stu | 47    | 44.80019 | raw study data                   |
| present study (technician 2) | present stu | 55    | 52.7004  | raw study data                   |
| present study (technician 2) | present stu | 51    | 53.80518 | raw study data                   |



|                              |             |      |          |                |
|------------------------------|-------------|------|----------|----------------|
| present study (technician 2) | present stu | 49   | 46.87932 | raw study data |
| present study (technician 2) | present stu | 49   | 52.32558 | raw study data |
| present study (technician 2) | present stu | 50   | 50.19223 | raw study data |
| present study (technician 2) | present stu | 47   | 53.16537 | raw study data |
| present study (technician 2) | present stu | 53.5 | 55.51228 | raw study data |
| present study (technician 2) | present stu | 52   | 51.17752 | raw study data |
| present study (technician 2) | present stu | 54   | 54.1297  | raw study data |
| present study (technician 2) | present stu | 45   | 53.30183 | raw study data |
| present study (technician 2) | present stu | 50   | 53.30771 | raw study data |
| present study (technician 2) | present stu | 47   | 55.47669 | raw study data |
| present study (technician 2) | present stu | 48   | 55.42636 | raw study data |
| present study (technician 2) | present stu | 48.7 | 55.44118 | raw study data |
| present study (technician 2) | present stu | 48   | 50.92006 | raw study data |
| present study (technician 2) | present stu | 50   | 44.18836 | raw study data |
| present study (technician 2) | present stu | 48   | 48.70443 | raw study data |
| present study (technician 2) | present stu | 48   | 50.43159 | raw study data |
| present study (technician 2) | present stu | 52   | 47.65131 | raw study data |
| present study (technician 2) | present stu | 54   | 50.73616 | raw study data |
| present study (technician 2) | present stu | 45   | 47.71522 | raw study data |
| present study (technician 2) | present stu | 47   | 43.95651 | raw study data |
| present study (technician 2) | present stu | 55   | 56.98698 | raw study data |
| present study (technician 2) | present stu | 54   | 47.85013 | raw study data |
| present study (technician 2) | present stu | 60   | 59.28532 | raw study data |
| present study (technician 2) | present stu | 51   | 53.08667 | raw study data |
| present study (technician 2) | present stu | 54   | 50.76441 | raw study data |
| present study (technician 2) | present stu | 49   | 52.61694 | raw study data |
| present study (technician 2) | present stu | 53   | 52.36235 | raw study data |
| present study (technician 2) | present stu | 47   | 53.23423 | raw study data |
| present study (technician 2) | present stu | 50   | 43.82125 | raw study data |
| present study (technician 2) | present stu | 48.2 | 56.99549 | raw study data |
| present study (technician 2) | present stu | 56   | 50.25641 | raw study data |
| present study (technician 2) | present stu | 53   | 45.00449 | raw study data |
| present study (technician 2) | present stu | 51   | 54.18935 | raw study data |
| present study (technician 2) | present stu | 55   | 49.96321 | raw study data |
| present study (technician 2) | present stu | 53   | 53.59395 | raw study data |
| present study (technician 2) | present stu | 50   | 53.50877 | raw study data |
| present study (technician 2) | present stu | 50   | 58.25714 | raw study data |
| present study (technician 2) | present stu | 54   | 56.9373  | raw study data |
| present study (technician 2) | present stu | 56   | 49.09264 | raw study data |
| present study (technician 2) | present stu | 48   | 46.75281 | raw study data |
| present study (technician 2) | present stu | 48   | 47.91092 | raw study data |
| present study (technician 2) | present stu | 51   | 50.17625 | raw study data |
| present study (technician 2) | present stu | 46   | 50       | raw study data |
| present study (technician 2) | present stu | 49   | 48.81743 | raw study data |
| present study (technician 2) | present stu | 53   | 54.94892 | raw study data |
| present study (technician 2) | present stu | 55   | 51.72255 | raw study data |
| present study (technician 2) | present stu | 43   | 49.7553  | raw study data |
| present study (technician 2) | present stu | 50   | 49.7304  | raw study data |
| present study (technician 2) | present stu | 55   | 57.61079 | raw study data |
| present study (technician 2) | present stu | 50   | 55.26194 | raw study data |

present study (technician 2)    present stu    50 46.47716 raw study data
